# Supplementary material for: Promoting polysulfide conversion by catalytic separator with LiNiPO4 and rGO hybrids for high performance Li–S batteries
Source: Royal Society of Chemistry journal article supplement (doi:10.1039/d0ta07292c), 2020-01-01
Supplement: d0ta07292c1.pdf [file d0ta07292c1.pdf]

# ***Promoting polysulfide conversion by catalytic separator with $\text{LiNiPO}_4$ and rGO hybrids for high performance lithium–sulfur batteries***

Yinze Zuo<sup>a,b</sup>, Yuejin Zhu<sup>a,d</sup>, Qi Wang<sup>a,b</sup>, Kezhong Lv<sup>a,b</sup>, Weiming Su<sup>a,b</sup>, Yuefeng Tang<sup>a,b,c\*</sup> and Yanfeng Chen<sup>a,b</sup>

<sup>a</sup>National Laboratory of Solid State Microstructures, Jiangsu Key Laboratory of Artificial Functional Materials, College of Engineering and Applied Sciences, Nanjing University, Nanjing, China.

<sup>b</sup>Collaborative Innovation Center of Advanced Microstructures, Nanjing University, Nanjing, China.

<sup>c</sup>SuZhou Sun Sources Nano Science and Technology Co. Ltd., ChangShu, SuZhou 215513, China.

<sup>d</sup>Institute of Advanced Synthesis, School of Chemistry and Molecular Engineering, Nanjing Tech University, Nanjing, China.

\*E-mail: [yftang@nju.edu.cn](mailto:yftang@nju.edu.cn)

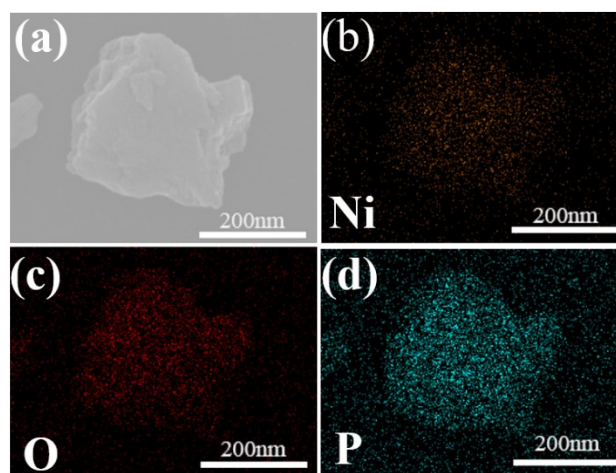

**Fig. S1.** The SEM image of LNPO and corresponding EDS mapping of Ni, O and P.

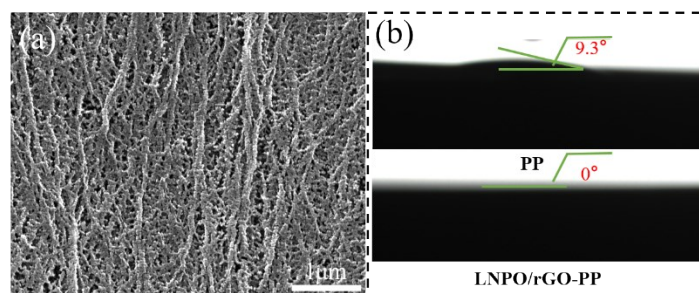

**Fig. S2.** (a) The SEM image of pristine separator and (b) surface wetting of electrolyte droplets on the pristine separator (PP) and LNPO/rGO modified separator.

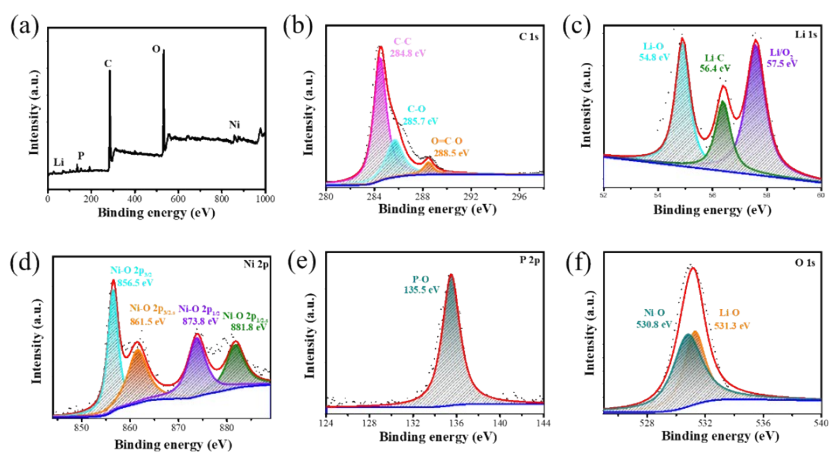

**Fig. S3.** (a) XPS and HRXPS spectra of the C 1s, Li 1s, Ni 2p, P 2p, O 1s in LNPO/rGO hybrids.

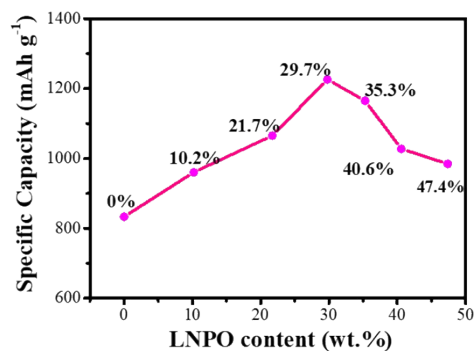

**Fig. S4.** Capacity optimization of LNPO content in the LNPO/rGO modified separator.

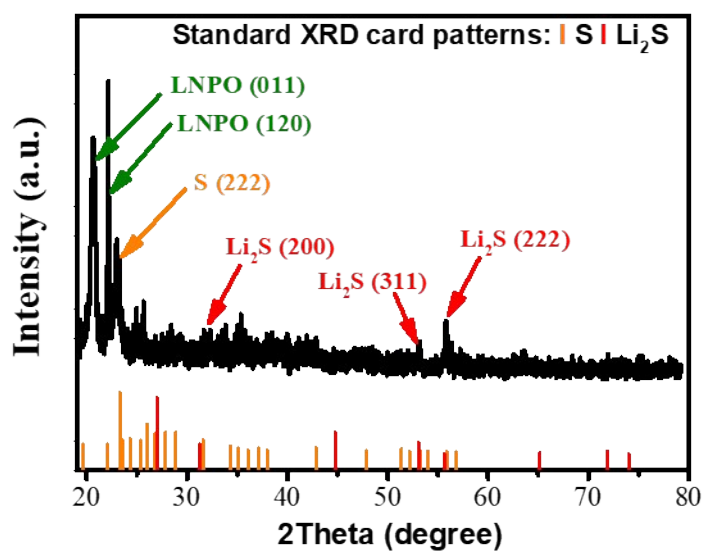

**Fig. S5.** XRD pattern of LNPO/rGO modified separator after cycling and standard XRD patterns sulfur and  $\text{Li}_2\text{S}$  powder.

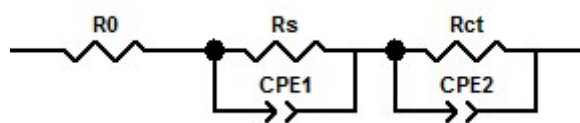

**Fig. S6.** The equivalent circuit diagram of the Nyquist plots.

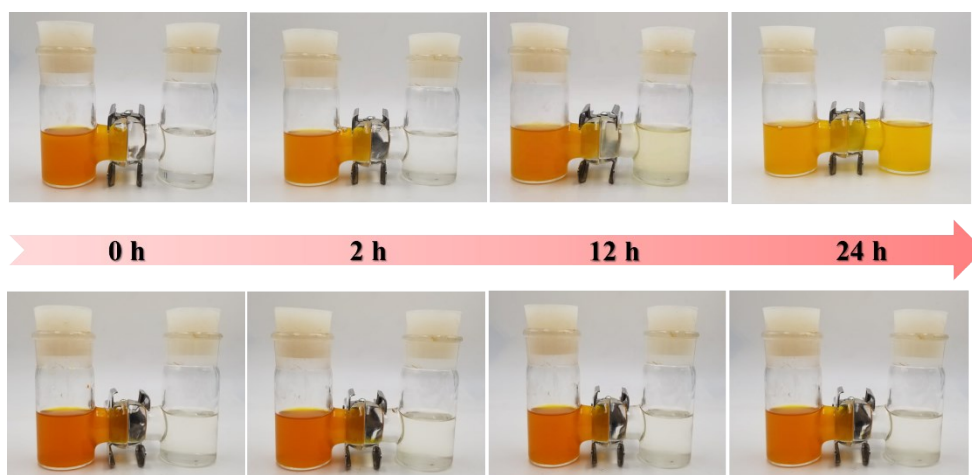

**Fig. S7.** Digital photographs of the  $\text{Li}_2\text{S}_6$  diffusion tests for the pristine separator (top) and LNPO/rGO modified separator (bottom)

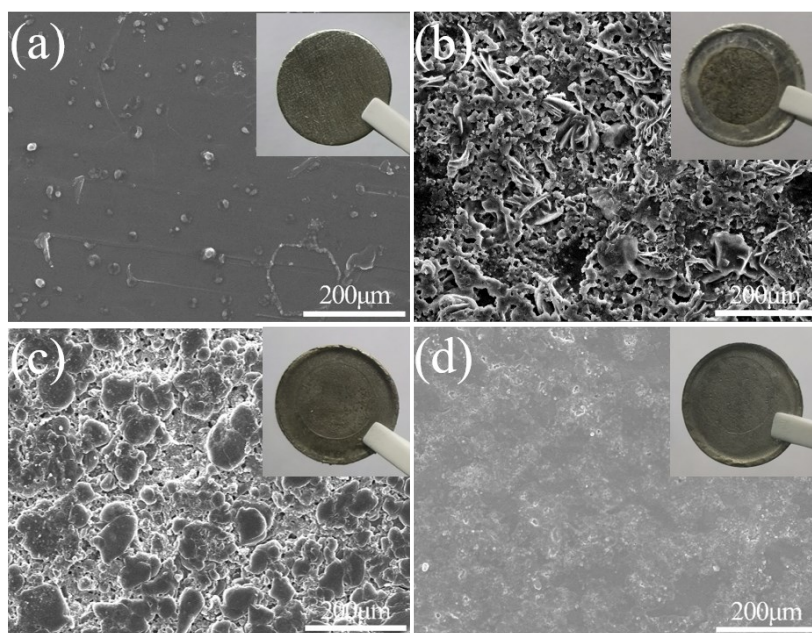

**Fig. S8.** (a) SEM images of the surface of (a) the pristine Li metal; the surface of Li metals in the cell with the (b) pristine separator, (c) rGO modified separator and (d) LNPO/rGO modified separator after cycling.

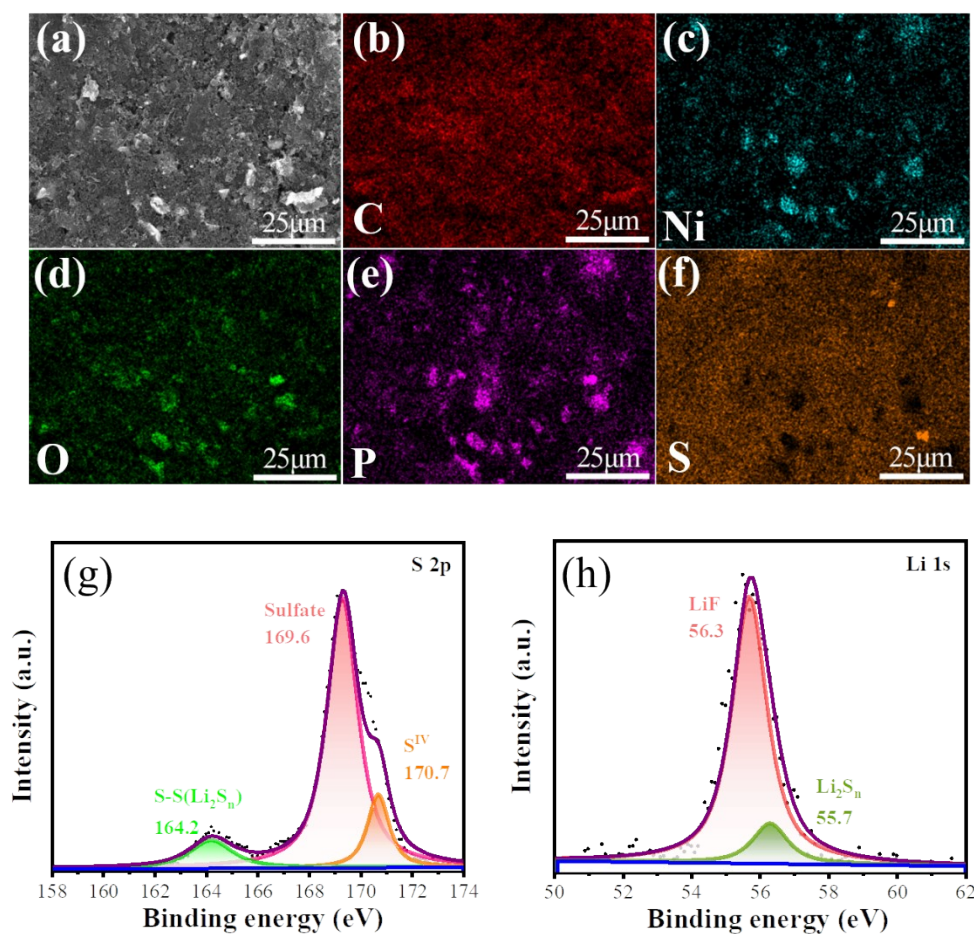

**Fig. S9.** (a) SEM image and corresponding elemental mapping images of (b) C, (c) Ni, (d) O, (e) P and (f) S elements of the LNPO/rGO modified separator after cycling and HRXPS spectra of (g) S 2p; and (h) Li 1s of the LNPO/rGO modified separator after cycling.

**Table S1.** Comparison of electrochemical properties functional separators in Li-S cells

| Coating or interlayer               | Sulfur loading (mg cm <sup>-2</sup> ) | Sulfur content (%) | Cycle number | Reversible capacity (mAh cm <sup>-2</sup> ) | Capacity retention (%) | Ref       |
|-------------------------------------|---------------------------------------|--------------------|--------------|---------------------------------------------|------------------------|-----------|
| MoO <sub>3</sub> /CNT               | 1                                     | 60                 | 400          | 655                                         | 55                     | S1        |
| Cu <sub>2</sub> (CuTCPP)            | 2                                     | 70                 | 900          | 604                                         | 71                     | S2        |
| MoO <sub>2</sub> /Mo <sub>2</sub> N | 1.1                                   | 70                 | 900          | 461                                         | 58                     | S3        |
| GA/CNFs/Ni                          | 1.5                                   | 90                 | 500          | 620                                         | 71                     | S4        |
| CNFs/VS <sub>4</sub>                | 1.25                                  | 80                 | 600          | 520                                         | 57                     | S5        |
| AC/Ni/N                             | 2                                     | 80                 | 700          | 575                                         | 65                     | S6        |
| LNPO/rGO                            | 1.5                                   | 80                 | 1400         | 629                                         | 67                     | This work |

**Table S2.** Comparison of electrochemical properties functional separators in Li–S cells with high sulfur loading

| Coating or interlayer           | Sulfur loading (mg cm <sup>-2</sup> ) | Sulfur content (%) | Cathode   | Discharge Capacity (mAh g <sup>-1</sup> ) | Areal capacity (mAh cm <sup>-2</sup> ) | Electrolyte/Sulfur ratio | Ref       |
|---------------------------------|---------------------------------------|--------------------|-----------|-------------------------------------------|----------------------------------------|--------------------------|-----------|
| GO@MoS <sub>2</sub>             | 3.64                                  | 70%                | CB/S      | ~600 mAh g <sup>-1</sup> , 95th, 0.2 C    | 2.2                                    | 14                       | S7        |
| SSNS/CNT                        | 1.0                                   | 65%                | KB/S      | 680 mAh g <sup>-1</sup> , 100th, 0.2 C    | <2.0                                   | N/A                      | S8        |
| CNF@ZrO <sub>2</sub>            | 2.7                                   | 70%                | CB/S      | 800 mAh g <sup>-1</sup> , 60th, 0.2 C     | ~2.1                                   | 40                       | S9        |
| TiN                             | 1.3                                   | 70%                | Super P/S | 744 mAh g <sup>-1</sup> , 200th, 0.5 C    | <2.0                                   | 46                       | S10       |
| g-C <sub>3</sub> N <sub>4</sub> | 4.0                                   | 45%                | GO/S      | ~600 mAh g <sup>-1</sup> , 60th, 0.2 C    | ~2.4                                   | 20                       | S11       |
| CoP                             | 3.24                                  | 56%                | rGO/S     | ~800 mAh g <sup>-1</sup> , 100th, 0.2 C   | ~2.7                                   | N/A                      | S12       |
| LNPO/rGO                        | 6                                     | 80%                | CB/S      | ~623 mAh g <sup>-1</sup> , 300th, 0.3 C   | 4.2                                    | 8.3                      | This work |

**Table S3.** The impedance parameters simulated from the equivalent circuit fitting of different cells

| Sample   | R <sub>0</sub> (Ω) | R <sub>ct</sub> (Ω) |
|----------|--------------------|---------------------|
| LNPO/rGO | 23.17              | 517                 |
| rGO      | 56.32              | 1853                |

[S1] L. Y. Luo, X. Y. Qin, J. X. Wu, G. M. Liang, Q. Li, M. Liu, F. Y. Kang, G. H. Chen, B. H. Li, An interwoven MoO<sub>3</sub>@CNT scaffold interlayer for high-performance lithium-sulfur batteries, *J. Mater. Chem. A*, **2018**, 6, 8612-8619.

[S2] M. Tian, F. Pei, M. S. Yao, Z. H. Fu, L. L. Lin, G. D. Wu, G. Xu, H. Kitagawa, X. L. Fang, Ultrathin MOF nanosheet assembled highly oriented microporous membrane as an interlayer for lithium-sulfur batteries, *Energy Storage Mater.* **2019**, 21, 14-21.

[S3] J. L. Yang, S. X. Zhao, Y. M. Lu, X. T. Zeng, W. Lv, G. Z. Cao, In-situ

topochemical nitridation derivative MoO<sub>2</sub>-Mo<sub>2</sub>N binary nanobelts as multifunctional interlayer for fast-kinetic Li-Sulfur batteries, *Nano energy*, **2020**, 68, 104356.

[S4] Y. Zhang, R. Wang, W. Tang, L. Zhan, S. Zhao, Q. Kang, Y. Wang, S. Yang, Efficient polysulfide barrier of a graphene aerogel-carbon nanofibers-Ni network for highenergy-density lithium-sulfur batteries with ultrahigh sulfur content, *J. Mater. Chem. A*, **2018**, 6, 20926-20938.

[S5] Y. Zhang, G. Xu, Q. Kang, L. Zhan, W. Tang, Y. Yu, K. Shen, H. Wang, X. Chu, J. Wang, S. Zhao, Y. Wang, L. Ling, S. Yang, Synergistic electrocatalysis of polysulfides by a nanostructured VS<sub>4</sub>-carbon nanofiber functional separator for high-performance lithium-sulfur batteries, *J. Mater. Chem. A*, **2019**, 7, 16812-16820.

[S6] Y. Zuo, M. Zhao, P. Ren, W. Su, J. Zhou, Y. Chen, Y. Tang, Y. Chen, An efficient polysulfide trapper of an nitrogen and nickel-decorating amyllum scaffold-coated separator for ultrahigh performance in lithium-sulfur batteries, *J. Mater. Chem. A*, **2020**, 8, 1238-1246.

[S7] L. Tan, X. H. Li, Z. X. Wang, H. J. Guo, J. X. Wang, Lightweight reduced graphene oxide@MoS<sub>2</sub> interlayer as polysulfide barrier for high-performance lithium-sulfur batteries, *ACS Appl. Mater. Interfaces*, **2018**, 10, 3707-3713

[S8] S. S. Yao, J. C. J. Q. Huang, Z. H. Lu, Y. Deng, W. G. Chong, J. X. Wu, M. Haq, F. Ciucci, J. K. Kim, Novel 2D Sb<sub>2</sub>S<sub>3</sub> nanosheet/CNT coupling layer for exceptional polysulfide recycling performance, *Adv. Energy Mater.*, **2018**, 1800710.

[S9] Y. Li, J. Zhu, R. Shi, M. Dirican, P. Zhu, C. Yan, H. Jia, J. Zang, J. He, X. Zhang, Ultrafine and polar ZrO<sub>2</sub>-inlaid porous nitrogen-doped carbon nanofiber as efficient polysulfide absorbent for high-performance lithium-sulfur batteries with long lifespan, *Chem. Eng. J.*, **2018**, 349, 376-387.

[S10] B. Y. Hao, H. Li, W. Lv, Y. B. Zhang, S. Z. Niu, Q. Qi, S. J. Xiao, J. Li, F. Y. Kang, Q. H. Yang, Reviving catalytic activity of nitrides by the doping of the inert surface layer to promote polysulfide conversion in lithium-sulfur batteries, *Nano Energy*, **2019**, 60, 305-311.

[S11] Y. Huang, T. Zheng, K. Zhang, X. She, H. Xu, Z. Fang, K. Xie, Facile fabrication of permselective g-C<sub>3</sub>N<sub>4</sub> separator for improved lithium-sulfur batteries, *Electrochim.*

*Acta*, **2018**, 272, 60-67.

[S12] X. X. Chen, X. Y. Ding, C. S. Wang, Z. Y. Feng, L. Q. Xu, X. Gao, Y. J. Zhai, D. B. Wang, A multi-shelled CoP nanosphere modified separator for highly efficient Li-S batteries, *Nanoscale*, **2018**, 10, 13694.
